# Supplementary material for: The effect of outpatient antibiotic treatment of coronavirus disease 2019 on the outcomes in the emergency department: a propensity score matching study
Source: PubMed Central journal article supplement (PMC8895338; doi:10.3325/cmj.2022.63.53), 2022-02

# Distribution of Propensity Scores

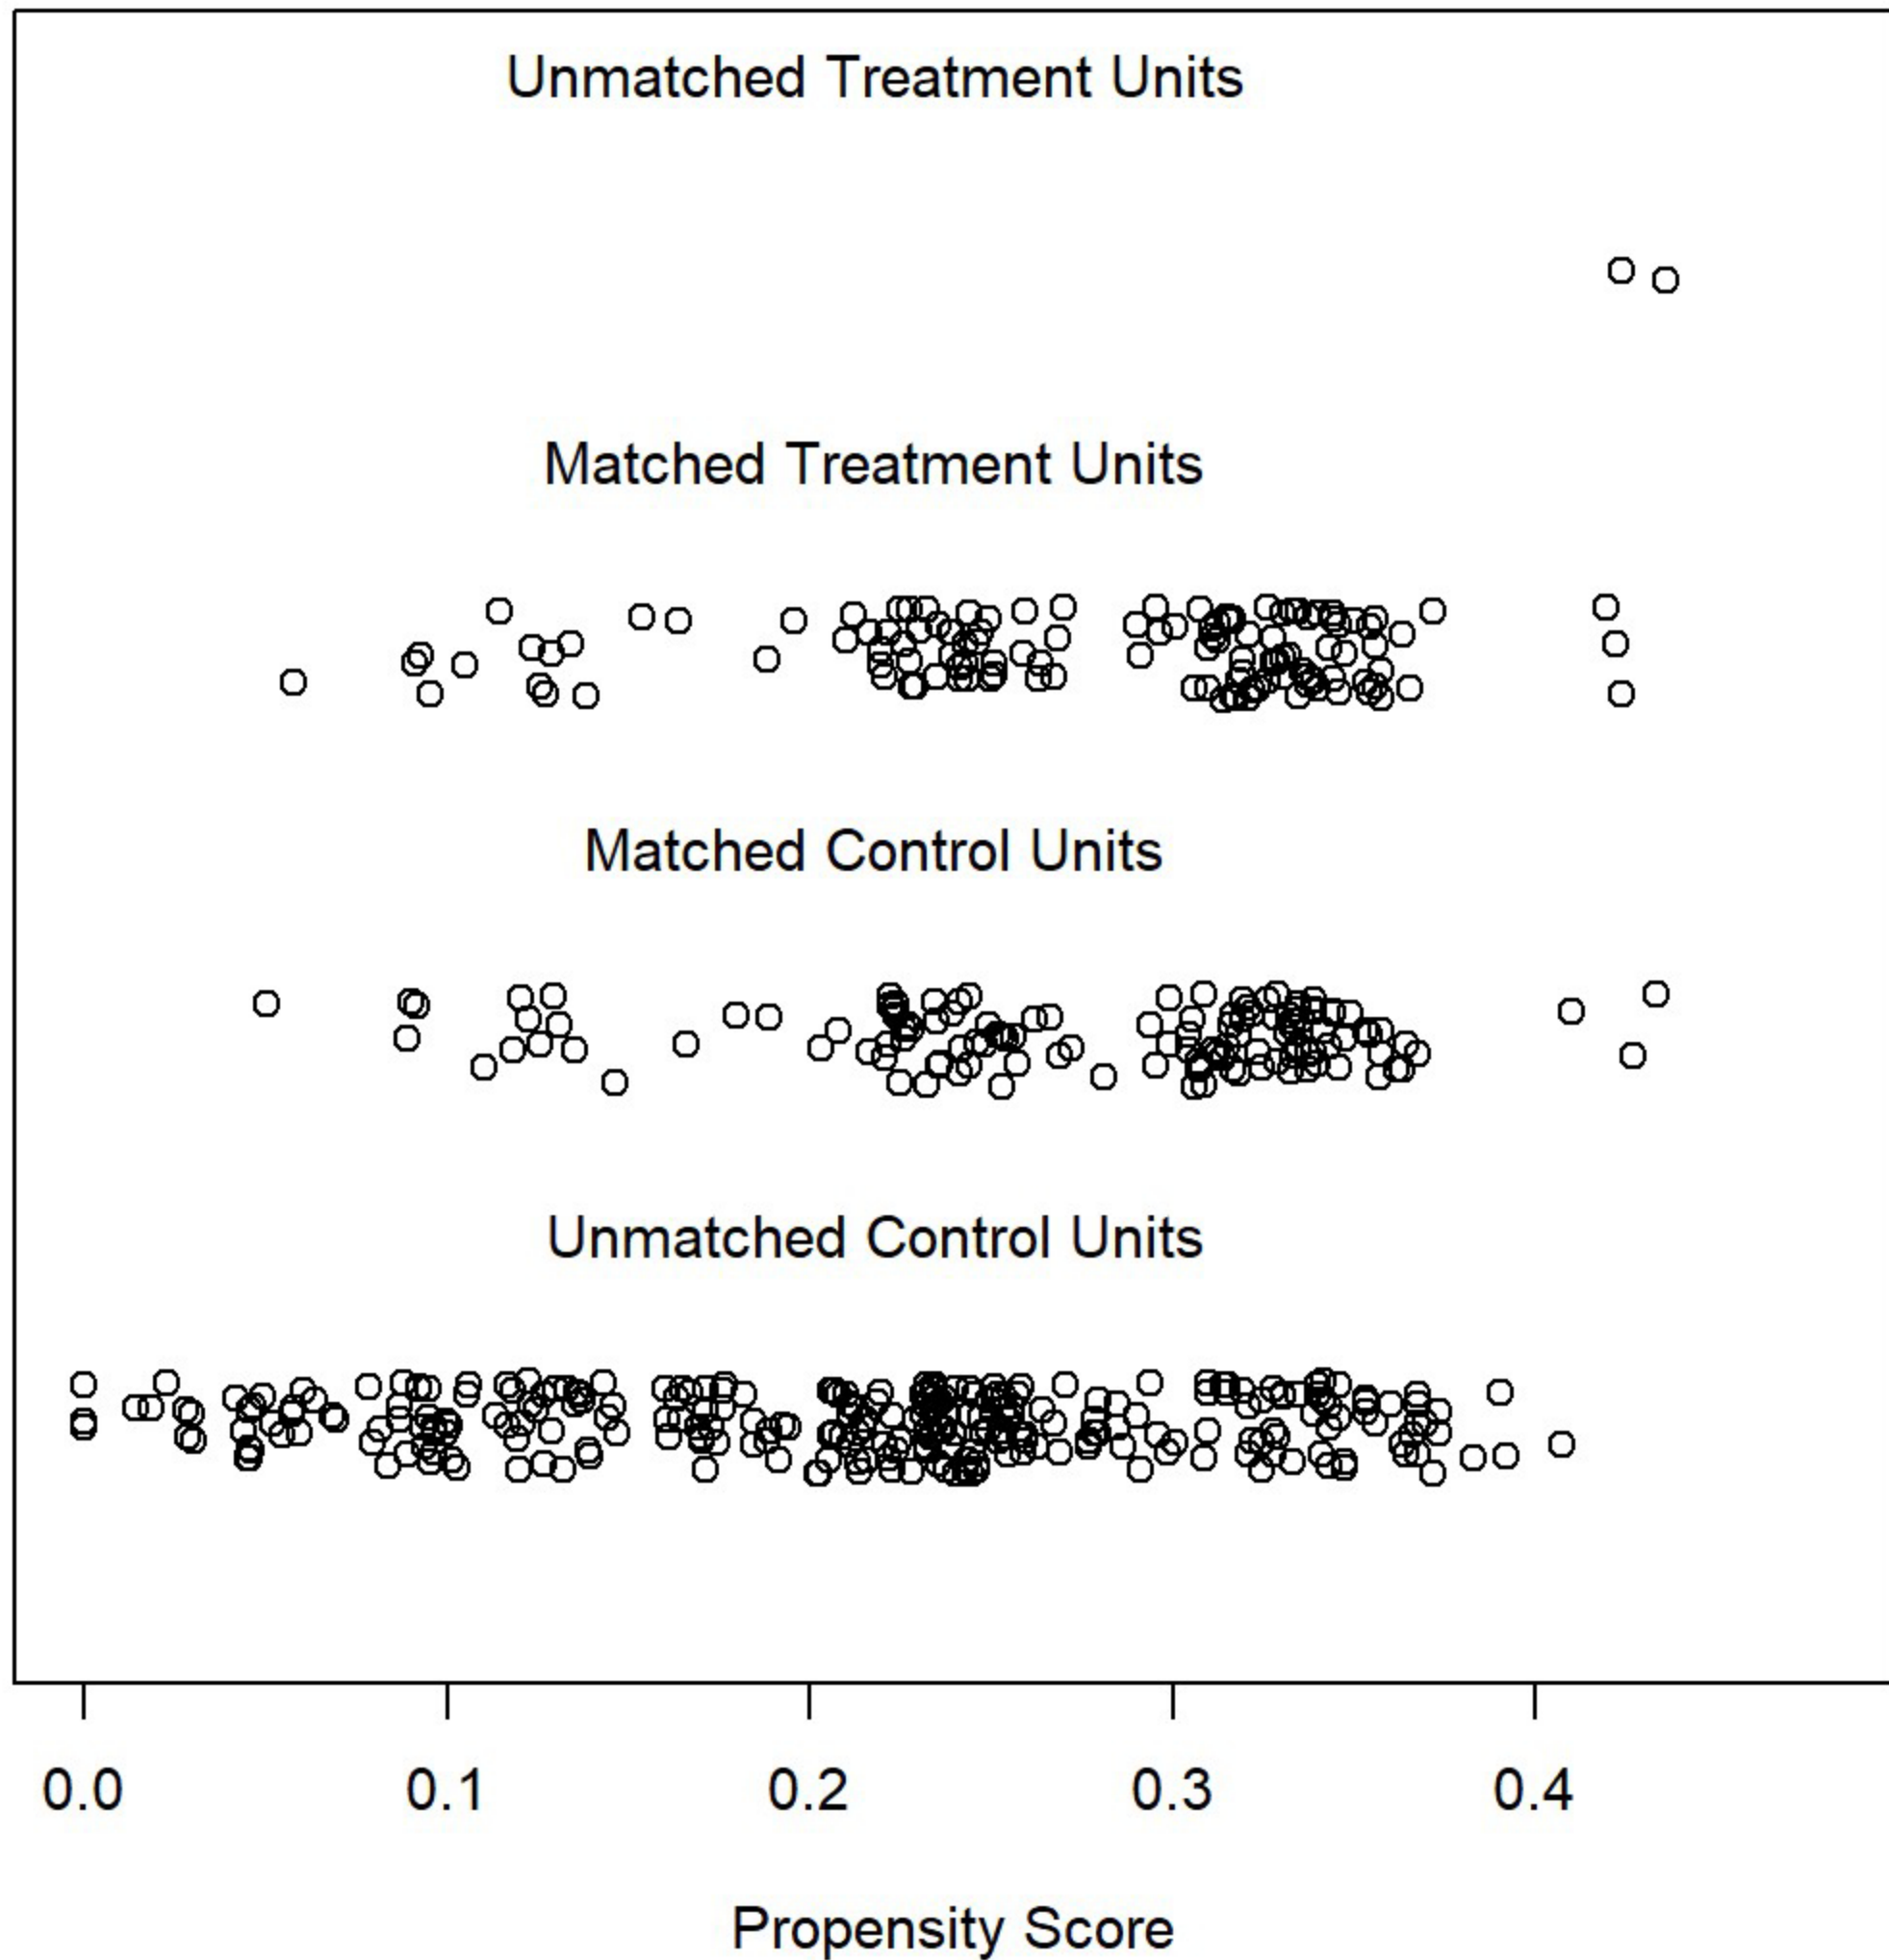

Supplement: CroatMedJ_63_s005.pdf [file CroatMedJ_63_s005.pdf]
